# Supplementary material
Source: PubMed Central journal article supplement (PMC2242689)

**a**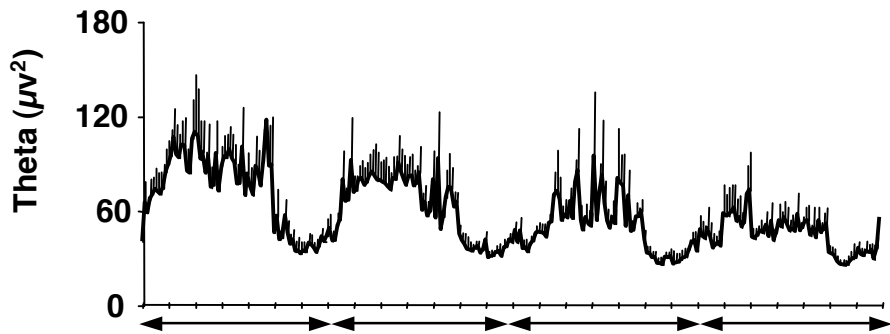**b**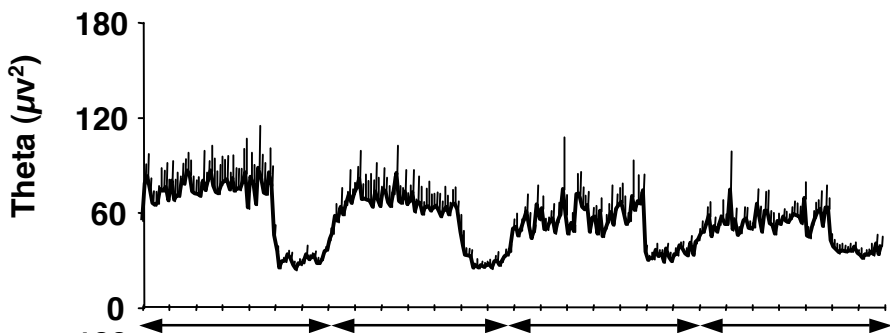**c**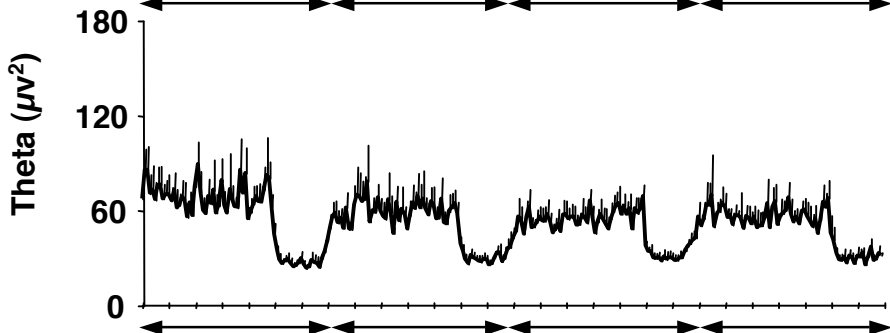**d**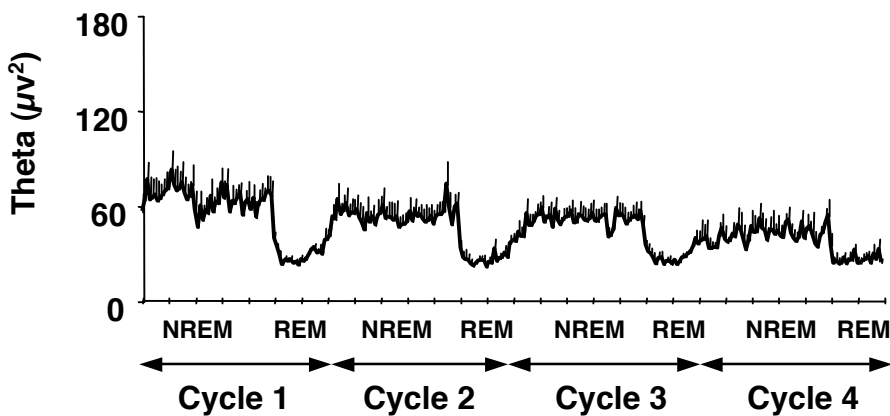

Supplement: pnas_0706446105_1.pdf [file pnas_0706446105_1.pdf]

**a**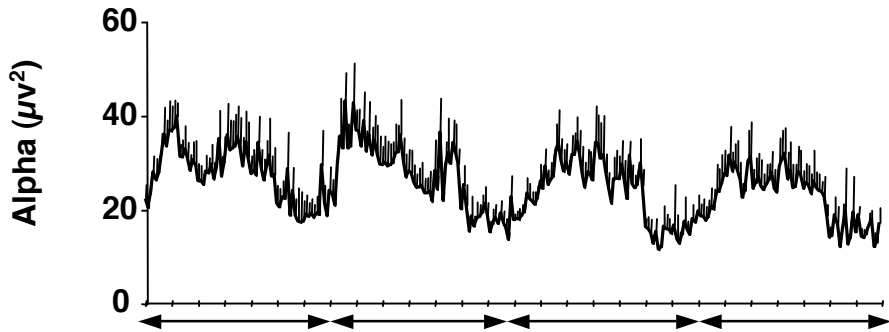**b**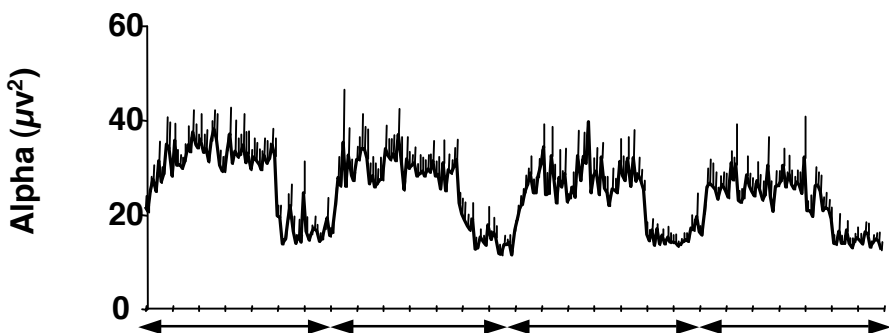**c**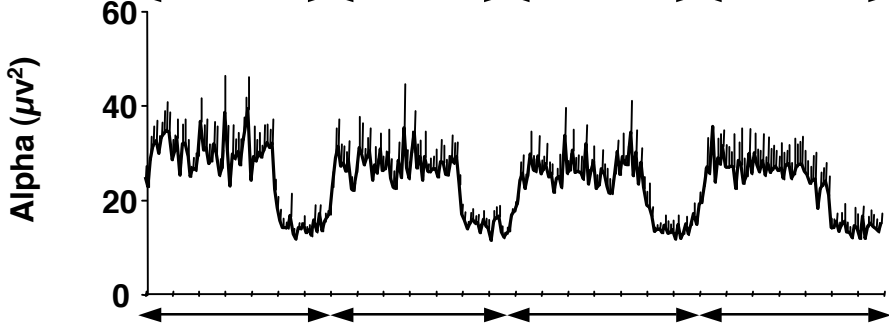**d**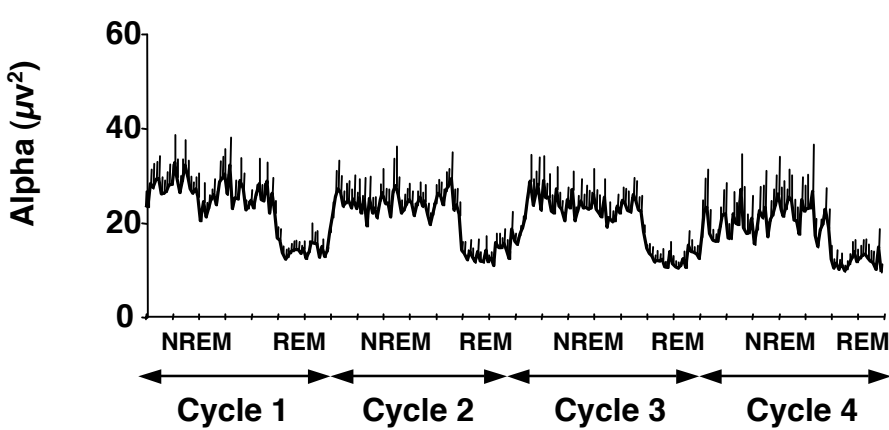

Supplement: pnas_0706446105_2.pdf [file pnas_0706446105_2.pdf]

**a**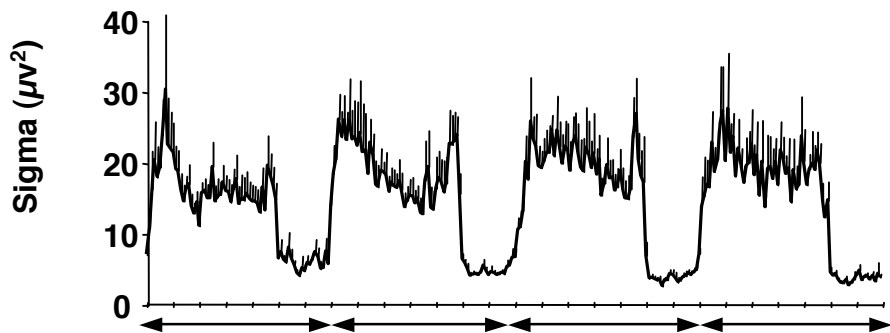**b**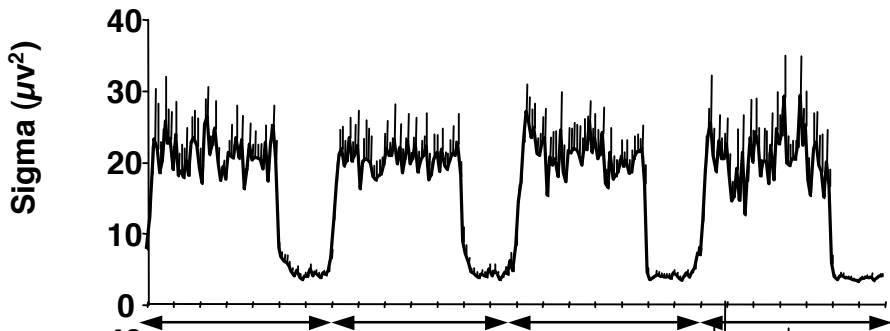**c**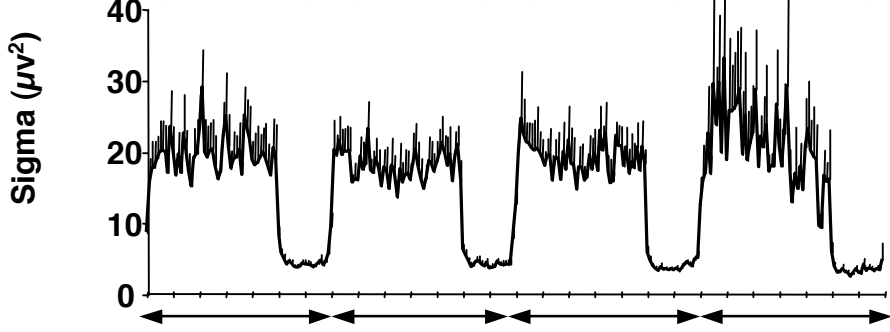**d**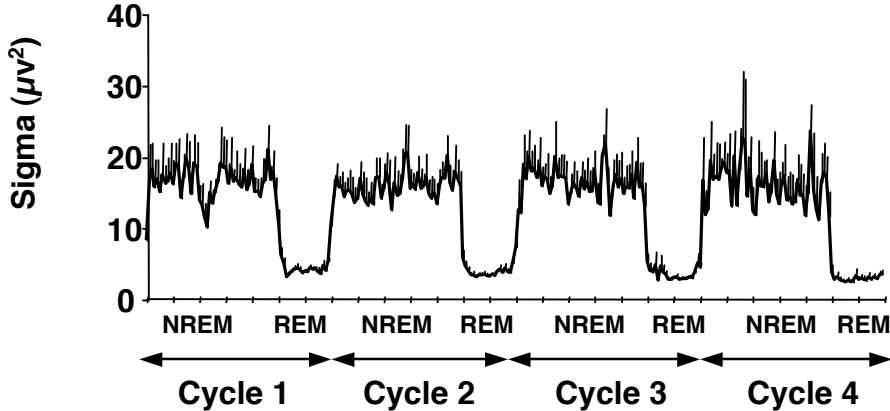

Supplement: pnas_0706446105_3.pdf [file pnas_0706446105_3.pdf]
